# Supplementary material for: Bulk analysis of columbite ores by LA-ICP-MS: development of reference materials and investigation into matrix effects
Source: Royal Society of Chemistry journal article supplement (doi:10.1039/d4ja00311j), 2024-11-22
Supplement: d4ja00311j1.pdf [file d4ja00311j1.pdf]

## **Supporting Information for**

### **Bulk analysis of columbite ores by LA-ICP-MS: development of reference materials and investigation into matrix effects**

Subramaniam Balachandar,<sup>a</sup> Wen Zhang,<sup>\*b</sup> Yongsheng Liu,<sup>a</sup> Zhaochu Hu,<sup>b</sup> Haihong

Chen,<sup>b</sup> Tao Luo,<sup>b</sup> He Tao,<sup>b</sup> Xianli Zeng<sup>b</sup>

<sup>a</sup> School of Earth Sciences, China University of Geosciences, Wuhan, 430074, PR  
China

<sup>b</sup> State Key Laboratory of Geological Processes and Mineral Resources, China  
University of Geosciences, Wuhan, 430074, PR China

e-mail: [tuyaken@hotmail.com](mailto:tuyaken@hotmail.com) (Wen Zhang)

**S1. Fig. S1: The photograph of the natural columbite ore**

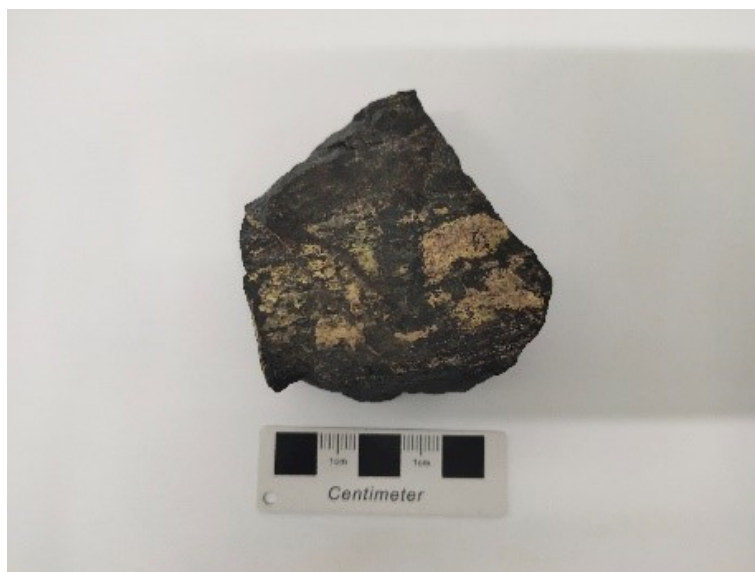

**S2. Fig. S2: The photographs of HSC and LSC pellets**

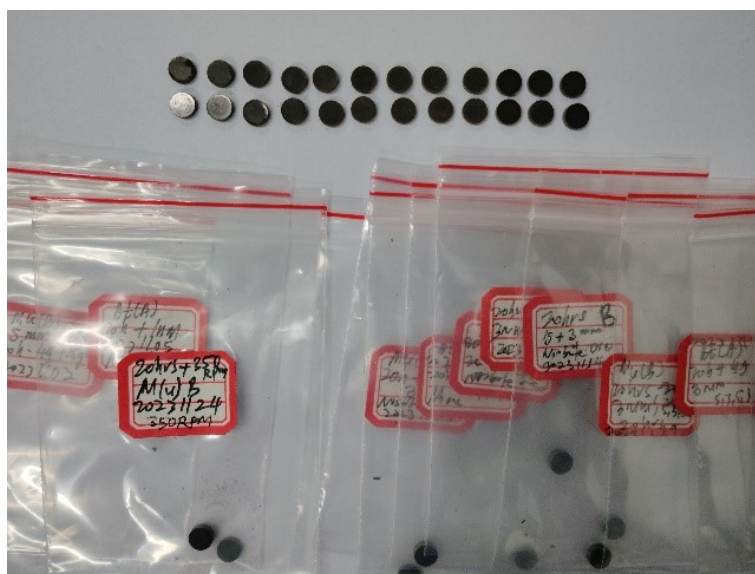

### S3. Determination of HSC and LSC using “Standard Addition” method and ICP-MS

The sample of HSC and LSC was digested and analyzed using the solution ICP-MS method, which was used as a reference method to ascertain the accuracy of the developed LA-ICP-MS methodology. The sample decomposition used an in-house cleaned stainless-steel bomb consisting of a 10 mL PTFE inner vessel with a lid, which fitted tightly into an outer stainless steel pressure jacket. Approximately 25 mg of each sample in triplicates was weighed and placed into a pre-cleaned 10 ml PTFE vessel. 1.5 ml HF and 0.5 ml HNO<sub>3</sub> were added slowly to the digestion vessel and sealed. Then, the stainless-steel bomb was tightly screwed and heated to 190 °C in an electric oven (Shanghai Jing Hong Laboratory Instrument Co., Ltd., Shanghai, China) for 48 hours. After cooling down, the clear solution obtained was transferred to a polyethylene bottle, and final volumes were made up to 100 g with ultrapure water. A procedural blank solution was prepared in the same way without the addition of any sample into PTFE vessel.

The prepared series solutions were analyzed using a high-resolution sector field ICP-MS instrument (Element XR, Thermo Fisher Scientific, Bremen, Germany) at the State Key Laboratory of Geological Processes and Mineral Resources, China University of Geosciences in Wuhan. Details of the operating condition and measurement parameters are summarized in [Table S1](#).

Table S1. Instrumental operating conditions for ICP-MS

| ICP-MS: Element XR      |                                  |
|-------------------------|----------------------------------|
| Torch Position X        | 3.7 mm                           |
| Torch Position Y        | 1.0 mm                           |
| Torch Position Z        | -3.0 mm                          |
| Cooling Gas Flow Rate   | 16.00 L min <sup>-1</sup>        |
| Auxiliary Gas Flow Rate | 1.00 L min <sup>-1</sup>         |
| Sample Gas Flow Rate    | 1.16 L min <sup>-1</sup>         |
| RF Power                | 1200 W                           |
| Peristaltic Pump Sped   | 8.00 rpm                         |
| Sample Cone             | Standard sampler cone, Nickel    |
| Skimmer Cone            | H skimmer                        |
| Spray Chamber           | Quartz double pass spray chamber |
| Resolution              | Low (R = 300)                    |
| Mass Window             | 100%                             |
| Sample Time             | 50 ms                            |
| Sample Per Peak         | 25                               |
| Integration Window      | 60%                              |
| Integration Type        | Average                          |
| Scan Type               | Escan                            |
| Detection System        | Triple                           |

To accurately quantify trace elements in the high and low standard concentration (HSC and LSC) samples, the standard addition method was employed, addressing the inherent matrix effect challenges. This technique is paramount when internal standards (In, Rh, Ge, Sc, Y, Bi) are

rendered ineffective due to pre-spiked elements within the sample.

The gravimetric standard addition method, substantiated by the work of [Kelly et al. \(2008\)](#), is encapsulated by the formula:

$$\left(\frac{m_x + m_s + m_d}{m_x}\right)I = k\left(\frac{m_s}{m_x}C_s\right) + kC_x$$

which has been foundational in determining the concentrations of trace elements in our study. Here,  $m_x$  is the mass of the sample,  $m_s$  the mass of the standard,  $m_d$  the mass of the diluent ( $I$ ) the instrumental response,  $C_s$  the mass fraction of the analyte in the standard,  $C_x$  the mass fraction of the analyte in the sample, and ( $k$ ) the instrument sensitivity. Usually, the masses of the sample and standard are determined during the sample preparation and can be plotted as  $y = ax + b$  with  $a = k$  and  $b = kC_x$ .  $C_x$  can then be determined by dividing the  $y$ -intercept by the slope of the linear regression ( $C_x = b/a$ ). This robust equation allowed for precise calculations of the elemental concentrations and facilitated the direct comparison between LA-ICP-MS and solution ICP-MS findings.

The ICP-MS signal of three replicates of the spiked and unspiked samples was average. The linear regression showed exemplary quantifications, exceeding 0.999, indicating the strong linear relationship between the added standard concentration and the observed intensities. The analytical results of trace elements in HSC and LSC are listed in [Table S2](#). The concentrations of the elements spiked into samples, which were subsequently used for quantitative calibrations in LA-ICP-MS, were established utilizing the values obtained through the method of standard addition in ICP-MS. This approach ensures the accuracy of the calibration process by directly accounting for matrix effects and enhancing the reliability of the quantitative analysis performed with LA-ICP-MS.

## References

Kelly, W.R., Toth, R.A., Wiese, K. (2008). Gravimetric Standard Addition for the Determination of Trace Elements in Geological Samples. *Analytical Chemistry*, 80(13), 5157-5163.

**S4. Table S2. Results for trace elements in HSC, LSC, HMIE-NP and MAKR-NP using solution method and LA-ICP-MS. The reference values of HMIE-NP and MAKR-NP are from certificates approved by the “myStandards GmbH”.**

| □  | Solution analysis |             |      |             | Certified values |            |         |          |
|----|-------------------|-------------|------|-------------|------------------|------------|---------|----------|
|    | HSC               |             | LSC  |             | HMIE-NP          |            | MAKR-NP |          |
|    | Mean              | SD<br>(n=6) | Mean | SD<br>(n=6) | Mean             | <i>U</i> * | Mean    | <i>U</i> |
| Li | 80.0              | 3.2         | 38.9 | 2.1         | 29.2             | 3.6        | -       | -        |
| Be | 80.2              | 1.9         | 39.1 | 2.0         | 13.5             | 2.0        | -       | -        |
| Sc | 80.6              | 1.4         | 41.6 | 1.9         | 3.70             | 0.5        | -       | -        |
| V  | 73.7              | 1.1         | 38.5 | 0.9         | 25.0             | 3.0        | 541     | 13       |
| Cr | 79.8              | 6.3         | 36.0 | 4.5         | 107              | 22         | 106     | 9        |
| Co | 87.6              | 2.6         | 44.9 | 0.8         | 5.35             | 0.47       | 99      | 7        |
| Ni | 79.5              | 2.1         | 37.7 | 2.1         | 41.8             | 4.0        | 109     | 9        |
| Cu | 102               | 3           | 58.1 | 0.9         | 201.0            | 14.0       | 211     | 19       |
| Zn | 474               | 19          | 508  | 10          | 74.5             | 13.3       | 920     | 111      |
| As | 95.5              | 7.1         | 54.8 | 2.3         | 12.4             | 1.2        | 29.3    | 4.4      |
| Rb | 97.1              | 2.2         | 35.8 | 1.1         | 24.0             | 1.3        | 6.63    | 0.75     |
| Sr | 94.6              | 2.6         | 53.1 | 2.2         | 43.6             | 2.1        | 61.1    | 2.4      |
| Y  | 57.0              | 3.9         | 32.9 | 2.3         | 7.97             | 1.08       | 30.0    | 2.8      |
| Zr | 963               | 35          | 944  | 68          | 14.1             | 2.4        | 18.1    | 4.8      |
| Nb | -                 | -           | -    | -           | 1.7              | 0.5        | 2.06    | 0.29     |
| Mo | 95.2              | 2.1         | 57.3 | 1.1         | 9.2              | 2.2        | -       | -        |
| Sn | 212               | 6           | 104  | 7           | 5.0              | 1          | 16.5    | 2.0      |
| Sb | 251               | 11          | 126  | 7           | 5.4              | 0.7        | -       | -        |
| Cs | 75.7              | 3.8         | 35.1 | 2.8         | 5.4              | 0.5        | 1.81    | 0.23     |
| Ba | 147               | 5           | 112  | 3           | 62.0             | 5.2        | 31.8    | 1.9      |
| La | 54.9              | 1.5         | 34.5 | 1.2         | 3.1              | 0.5        | 17.7    | 1.6      |
| Ce | 64.4              | 2.0         | 36.1 | 1.1         | 6.2              | 1.1        | 36.1    | 3.2      |
| Pr | 51.7              | 1.5         | 24.1 | 1.0         | 0.80             | 0.16       | 4.38    | 0.4      |
| Nd | 56.2              | 0.7         | 28.0 | 1.3         | 3.30             | 0.7        | 17.1    | 1.5      |
| Sm | 54.7              | 1.9         | 29.2 | 1.8         | 0.81             | 0.15       | 3.53    | 0.30     |
| Eu | 52.5              | 1.1         | 26.1 | 1.3         | 0.19             | 0.05       | 0.65    | 0.06     |
| Gd | 55.3              | 1.3         | 30.0 | 2.2         | 1.03             | 0.24       | 4.4     | 0.4      |
| Tb | 52.6              | 0.8         | 24.1 | 1.8         | 0.19             | 0.05       | 0.71    | 0.07     |
| Dy | 58.5              | 2.0         | 31.3 | 1.6         | 1.2              | 0.3        | 4.60    | 0.50     |
| Ho | 73.7              | 1.7         | 39.3 | 2.1         | 0.26             | 0.07       | 0.92    | 0.09     |
| Er | 54.1              | 2.2         | 25.6 | 1.1         | 0.76             | 0.18       | 2.60    | 0.30     |
| Tm | 52.9              | 1.5         | 22.6 | 1.5         | 0.11             | 0.03       | 0.33    | 0.03     |
| Yb | 55.4              | 1.1         | 23.6 | 1.8         | 0.73             | 0.15       | 1.90    | 0.21     |
| Lu | 51.2              | 1.1         | 22.9 | 2.0         | 0.11             | 0.03       | 0.28    | 0.03     |
| Hf | 281               | 7           | 226  | 2           | 0.3              | 0.1        | 0.50    | 0.10     |
| Ta | -                 | -           | -    | -           | 1.2              | 0.3        | 0.20    | -        |
| Tl | 158               | 2           | 77.8 | 1.5         | 0.11             | -          | -       | -        |
| Pb | 972               | 10          | 993  | 5           | 203              | 18         | 78      | 14       |
| Bi | 174               | 4           | 153  | 4           | 0.62             | -          | -       | -        |

|    |   |   |   |   |      |      |      |      |
|----|---|---|---|---|------|------|------|------|
| Th | - | - | - | - | 1.07 | 0.18 | 2.10 | 0.45 |
| U  | - | - | - | - | 2.97 | 0.21 | 0.49 | 0.09 |

\*: U means "Uncertainty (95% CL) "

(Continued)

| □  | Ns-LA analysis    |              |               |                |              |               |                       |              |               |                    |              |               |
|----|-------------------|--------------|---------------|----------------|--------------|---------------|-----------------------|--------------|---------------|--------------------|--------------|---------------|
|    | LSC* (Si as ID**) |              |               | LSC (Fe as ID) |              |               | MAKR-NP*** (Si as ID) |              |               | MAKR-NP (Fe as ID) |              |               |
|    | Mean              | SD<br>(n=15) | <i>RD (%)</i> | Mean           | SD<br>(n=15) | <i>RD (%)</i> | Mean                  | SD<br>(n=15) | <i>RD (%)</i> | Mean               | SD<br>(n=15) | <i>RD (%)</i> |
| Li | 36.6              | 1.0          | <b>-6.0</b>   | 35.3           | 1.1          | <b>-9.3</b>   | 10.8                  | 1.4          | -             | 11.3               | 1.2          | -             |
| Be | 39.4              | 0.8          | <b>0.8</b>    | 38.0           | 1.0          | <b>-2.7</b>   | 33.9                  | 4.4          | -             | 35.7               | 5.3          | -             |
| Sc | 39.0              | 0.9          | <b>-6.3</b>   | 37.7           | 0.8          | <b>-9.5</b>   | 3.67                  | 0.20         | -             | 3.84               | 0.23         | -             |
| V  | 36.4              | 0.7          | <b>-5.3</b>   | 35.2           | 0.6          | <b>-8.6</b>   | 540                   | 14           | <b>-0.1</b>   | 541                | 11           | <b>-0.1</b>   |
| Cr | 36.5              | 1.6          | <b>1.4</b>    | 35.2           | 1.5          | <b>-2.1</b>   | 116                   | 7            | <b>9.5</b>    | 123                | 9            | <b>15.6</b>   |
| Co | 38.0              | 0.1          | <b>-15.5</b>  | 36.6           | 0.3          | <b>-18.4</b>  | 98.6                  | 2.2          | <b>-0.4</b>   | 98.6               | 2.5          | <b>-0.4</b>   |
| Ni | 32.4              | 0.6          | <b>-14.1</b>  | 31.2           | 0.3          | <b>-17.1</b>  | 107                   | 6            | <b>-1.4</b>   | 108                | 6            | <b>-1.2</b>   |
| Cu | 68.3              | 5.8          | <b>17.5</b>   | 65.9           | 5.4          | <b>13.4</b>   | 221                   | 33           | <b>4.9</b>    | 229                | 37           | <b>8.6</b>    |
| Zn | 527               | 28           | <b>3.7</b>    | 508            | 28           | <b>0.0</b>    | 924                   | 34           | <b>0.5</b>    | 929                | 24           | <b>0.9</b>    |
| As | 52.5              | 0.8          | <b>-4.2</b>   | 50.7           | 0.9          | <b>-7.6</b>   | 32.0                  | 11.2         | <b>9.1</b>    | 32.0               | 11.7         | <b>9.3</b>    |
| Rb | 37.0              | 0.4          | <b>3.3</b>    | 35.7           | 0.5          | <b>-0.3</b>   | 7.15                  | 0.36         | <b>7.9</b>    | 7.50               | 0.27         | <b>13.1</b>   |
| Sr | 50.2              | 1.5          | <b>-5.5</b>   | 48.4           | 1.4          | <b>-8.8</b>   | 60.7                  | 2.4          | <b>-0.7</b>   | 61.5               | 1.7          | <b>0.6</b>    |
| Y  | 34.7              | 0.6          | <b>5.7</b>    | 33.5           | 0.7          | <b>2.1</b>    | 29.8                  | 3.0          | <b>-0.5</b>   | 29.8               | 2.8          | <b>-0.7</b>   |
| Zr | 971               | 7            | <b>2.8</b>    | 937            | 9            | <b>-0.8</b>   | 19.2                  | 3.2          | <b>6.1</b>    | 19.8               | 3.1          | <b>9.4</b>    |
| Nb | -                 | -            | -             | -              | -            | -             | 1.90                  | 0.09         | <b>-8.0</b>   | 1.86               | 0.12         | <b>-9.7</b>   |
| Mo | 52.6              | 0.7          | <b>-8.2</b>   | 50.8           | 0.4          | <b>-11.4</b>  | 55.0                  | 13.9         | -             | 57.6               | 16.3         | -             |
| Sn | 101               | 1            | <b>-2.3</b>   | 97.9           | 0.8          | <b>-5.7</b>   | 17.3                  | 3.3          | <b>4.6</b>    | 17.2               | 3.0          | <b>4.5</b>    |
| Sb | 129               | 1            | <b>3.0</b>    | 125            | 2            | <b>-0.6</b>   | 12.0                  | 0.7          | -             | 12.6               | 1.1          | -             |
| Cs | 33.0              | 1.6          | <b>-5.9</b>   | 31.8           | 1.4          | <b>-9.2</b>   | 1.92                  | 0.15         | <b>6.1</b>    | 2.01               | 0.14         | <b>10.9</b>   |
| Ba | 109               | 5            | <b>-2.7</b>   | 105            | 5            | <b>-6.1</b>   | 33.2                  | 1.8          | <b>4.5</b>    | 34.6               | 1.5          | <b>8.8</b>    |
| La | 31.9              | 1.5          | <b>-7.7</b>   | 30.8           | 1.4          | <b>-10.9</b>  | 17.7                  | 2.3          | <b>0.1</b>    | 17.6               | 2.4          | <b>-0.4</b>   |
| Ce | 31.5              | 0.3          | <b>-12.6</b>  | 30.5           | 0.3          | <b>-15.6</b>  | 36.3                  | 4.4          | <b>0.4</b>    | 36.3               | 4.9          | <b>0.6</b>    |
| Pr | 23.9              | 0.4          | <b>-0.8</b>   | 23.1           | 0.4          | <b>-4.3</b>   | 4.38                  | 0.39         | <b>0.0</b>    | 4.38               | 0.39         | <b>0.1</b>    |
| Nd | 27.3              | 0.4          | <b>-2.4</b>   | 26.4           | 0.5          | <b>-5.8</b>   | 17.1                  | 1.3          | <b>0.0</b>    | 17.1               | 1.3          | <b>0.1</b>    |
| Sm | 27.0              | 0.4          | <b>-7.7</b>   | 26.0           | 0.5          | <b>-10.9</b>  | 3.57                  | 0.35         | <b>1.0</b>    | 3.59               | 0.30         | <b>1.6</b>    |
| Eu | 24.4              | 0.4          | <b>-6.7</b>   | 23.5           | 0.3          | <b>-9.9</b>   | 0.64                  | 0.04         | <b>-1.4</b>   | 0.64               | 0.05         | <b>-1.4</b>   |
| Gd | 28.3              | 0.7          | <b>-5.8</b>   | 27.3           | 0.7          | <b>-9.1</b>   | 4.35                  | 0.32         | <b>-1.0</b>   | 4.34               | 0.28         | <b>-1.3</b>   |
| Tb | 24.6              | 0.3          | <b>2.2</b>    | 23.8           | 0.3          | <b>-1.3</b>   | 0.70                  | 0.06         | <b>-0.8</b>   | 0.70               | 0.06         | <b>-0.9</b>   |
| Dy | 30.4              | 0.5          | <b>-2.7</b>   | 29.4           | 0.4          | <b>-6.1</b>   | 4.73                  | 1.05         | <b>2.7</b>    | 4.72               | 1.03         | <b>2.5</b>    |
| Ho | 34.0              | 0.6          | <b>-13.5</b>  | 32.8           | 0.6          | <b>-16.5</b>  | 0.92                  | 0.11         | <b>-0.3</b>   | 0.92               | 0.10         | <b>-0.5</b>   |
| Er | 26.1              | 0.4          | <b>2.1</b>    | 25.2           | 0.5          | <b>-1.4</b>   | 2.57                  | 0.26         | <b>-1.0</b>   | 2.57               | 0.24         | <b>-1.3</b>   |
| Tm | 23.4              | 0.4          | <b>3.7</b>    | 22.6           | 0.3          | <b>0.1</b>    | 0.32                  | 0.03         | <b>-1.6</b>   | 0.32               | 0.03         | <b>-2.1</b>   |
| Yb | 26.5              | 0.4          | <b>12.1</b>   | 25.6           | 0.4          | <b>8.2</b>    | 1.89                  | 0.18         | <b>-0.6</b>   | 1.89               | 0.16         | <b>-0.4</b>   |
| Lu | 23.4              | 0.3          | <b>2.1</b>    | 22.6           | 0.3          | <b>-1.5</b>   | 0.27                  | 0.02         | <b>-2.3</b>   | 0.27               | 0.02         | <b>-2.6</b>   |
| Hf | 207               | 2            | <b>-8.8</b>   | 199            | 2            | <b>-11.9</b>  | 0.52                  | 0.10         | <b>3.6</b>    | 0.52               | 0.10         | <b>4.5</b>    |
| Ta | -                 | -            | -             | -              | -            | -             | 0.23                  | 0.02         | <b>17.0</b>   | 0.25               | 0.02         | <b>23.8</b>   |

|    |      |     |             |      |     |             |      |      |              |       |      |              |
|----|------|-----|-------------|------|-----|-------------|------|------|--------------|-------|------|--------------|
| Tl | 76.4 | 0.6 | <b>-1.8</b> | 73.7 | 0.5 | <b>-5.3</b> | 0.07 | 0.01 | -            | 0.08  | 0.01 | -            |
| Pb | 970  | 7   | <b>-2.3</b> | 936  | 12  | <b>-5.7</b> | 97.8 | 18.6 | <b>25.4</b>  | 105.8 | 22.6 | <b>35.6</b>  |
| Bi | 149  | 1   | <b>-2.2</b> | 144  | 2   | <b>-5.6</b> | 1.46 | 0.17 | -            | 1.53  | 0.17 | -            |
| Th | -    | -   | -           | -    | -   | -           | 1.98 | 0.14 | <b>-5.5</b>  | 1.95  | 0.18 | <b>-7.1</b>  |
| U  | -    | -   | -           | -    | -   | -           | 0.42 | 0.02 | <b>-15.0</b> | 0.42  | 0.02 | <b>-13.6</b> |

\*: HSC and HMIE-NP were used as external standard for LA analysis

\*\*: ID means "internal standard"

---
